# Supplementary material
Source: PubMed Central journal article supplement (PMC4325097)
Supplement: JB.02429-14_zjb999093501so2.pdf [file JB.02429-14_zjb999093501so2.pdf]

**Table S1. Oligonucleotides used in this work.**

---

|                 |                                   |
|-----------------|-----------------------------------|
| 454A            | GTCTAGACGATTTTCAGGGCCGAATGTCC     |
| 454B            | GGAGCTCGGCTCAACGTCTCGCCCTGT       |
| 454mutbad1      | GCAATGCCGCCGGCAAACCTGGCCGATCGCCTG |
| 454mutbad2      | CAGGCGATCGGCCAGTTTGCCGGCGGCATTGC  |
| aadABam1        | GCGGATCCTCATGATATATCTCCCAATTTG    |
| aadABam2        | GCGGATCCCCTGAAGCCAGGGCAGATCCG     |
| cck A387Pfw     | AAGCTGGCCGATCGGCTGCATTTTCTGGC     |
| cck A387Prv     | GCCAGAAAATGCAGCCGATCGGCCAGCTT     |
| cck F399Cfw     | GTGAGCAGATTGTTGCAGTCATGGGCAATGCC  |
| cck F399Crv     | GGCATTGCCCATGACTGCAACAATCTGCTCAC  |
| cckAHKfwpBAD    | GGAGCTCGAGGTCTGAAGGCCTGGGCGAAC    |
| cckARR2pBAD2    | GAAGCTTGGTCAGTGCACCTGCTCCTGCAC    |
| chpTmutdown1    | GATATCAGATCCGCGAGTCCGAGAT         |
| chpTmutdown2    | CTGCAGGATGCGGATCTCGAGAAGG         |
| chpTmutup1      | GGATCCAGCAGGAGATGGTTCGAGA         |
| chpTmutup2      | GATATCAGATGCGCGAACCCAGAA          |
| ctrAfor         | GGTCTAGACGGCAACTTTAGATTGTAT       |
| ctrAinfor       | GTGGATCCAGGGCACGACGCTCACGAAG      |
| ctrAinrev       | CAGGATCCGCGGAGCTGGCGCAGGACCT      |
| ctrArev         | GTGAATTCTCCGCAGCTTTAGGCAACC       |
| fliFL3          | CCGAATTCAGACCGAGCACGGCCAGGAAC     |
| fliFL4          | GCTCTAGACAGGCCCGACCAGGTGGCGTAG    |
| FwchpTXbaI      | GCTCTAGATGGATTGCACCTGACCCA        |
| regB1           | GTCTAGA GGCACGGCAACCTAACAAGG      |
| regB2           | GCGGTACCGGGACAGCTTGCCGAGAGGA      |
| regBdwEcoRVfw   | GCGATATCTCCACGGTCTGGATCGACG       |
| regBdwSacIrv    | GCGAGCTCGCACGAGATAGGCGAGAAGC      |
| regBupEcoRVrv   | GCGATATCTCAGGAACAGCAGGAACGACA     |
| regBupXbafw     | GCTCTAGAGAGGGCTTTGCCAGAACCTC      |
| RvchpTSaI       | GCGAGCTCCGAGCAGCTCACGAGTTTCA      |
| Ser267regBqchrV | CCCGGCCCGGCCATCGAGCGGAGGATGTCCGG  |
| Ser267regBqchfw | CGCGACATCCTCCGCTCGATGGGCCGGGCCGGG |
